# Supplementary material for: Metagenome-Scale Metabolic Network Suggests Folate Produced by Bifidobacterium longum Might Contribute to High-Fiber-Diet-Induced Weight Loss in a Prader–Willi Syndrome Child
Source: MDPI journal article supplement (doi:10.3390/microorganisms9122493), 2021-12-01
Supplement: s1 [file s1]

Table S1: Total flux intake

| <b>flux</b>           | <b>D0, D15, D30<br/>(mmol/day)</b> | <b>D45, D60<br/>(mmol/day)</b> | <b>D75, D105<br/>(mmol/day)</b> |
|-----------------------|------------------------------------|--------------------------------|---------------------------------|
| <b>EX_5mthf(e)</b>    | 3.47E-04                           | 2.16E-04                       | 2.09E-04                        |
| <b>EX_ala_D(e)</b>    | 2.33E+01                           | 1.34E+01                       | 1.29E+01                        |
| <b>EX_ala_L(e)</b>    | 2.36E+01                           | 1.37E+01                       | 1.31E+01                        |
| <b>EX_arach(e)</b>    | 2.15E-01                           | 1.97E-01                       | 1.94E-01                        |
| <b>EX_arg_L(e)</b>    | 3.72E+01                           | 2.15E+01                       | 2.07E+01                        |
| <b>EX_ascb_L(e)</b>   | 1.18E+00                           | 7.90E-01                       | 7.67E-01                        |
| <b>EX_asp_D(e)</b>    | 3.32E+01                           | 1.92E+01                       | 1.84E+01                        |
| <b>EX_asp_L(e)</b>    | 3.34E+01                           | 1.93E+01                       | 1.85E+01                        |
| <b>EX_avite1(e)</b>   | 1.86E-02                           | 1.26E-02                       | 1.22E-02                        |
| <b>EX_ca2(e)</b>      | 1.33E+01                           | 8.17E+00                       | 7.88E+00                        |
| <b>EX_caro(e)</b>     | 2.25E-04                           | 1.30E-04                       | 1.25E-04                        |
| <b>EX_CE2510(e)</b>   | 7.41E+00                           | 4.34E+00                       | 4.17E+00                        |
| <b>EX_chol(e)</b>     | 1.43E+00                           | 8.27E-01                       | 7.94E-01                        |
| <b>EX_cellul(e)</b>   | 5.93E-02                           | 3.43E-02                       | 3.29E-02                        |
| <b>EX_cu2(e)</b>      | 6.55E-02                           | 3.86E-02                       | 3.71E-02                        |
| <b>EX_cys_L(e)</b>    | 2.63E-02                           | 1.52E-02                       | 1.46E-02                        |
| <b>EX_dca(e)</b>      | 1.95E-02                           | 1.13E-02                       | 1.08E-02                        |
| <b>EX_ddca(e)</b>     | 2.23E-01                           | 1.29E-01                       | 1.24E-01                        |
| <b>EX_doco13ac(e)</b> | 5.77E-02                           | 3.33E-02                       | 3.20E-02                        |
| <b>EX_docosac(e)</b>  | 6.14E-02                           | 5.62E-02                       | 5.55E-02                        |
| <b>EX_fe2(e)</b>      | 4.54E-01                           | 2.67E-01                       | 2.57E-01                        |
| <b>EX_fe3(e)</b>      | 2.47E-01                           | 1.47E-01                       | 1.41E-01                        |
| <b>EX_fol(e)</b>      | 4.43E-04                           | 2.72E-04                       | 2.62E-04                        |
| <b>EX_fru(e)</b>      | 6.67E+01                           | 3.86E+01                       | 3.70E+01                        |
| <b>EX_glc_D(e)</b>    | 6.03E+01                           | 3.48E+01                       | 3.35E+01                        |
| <b>EX_glu_L(e)</b>    | 1.08E+02                           | 6.27E+01                       | 6.02E+01                        |
| <b>EX_gly(e)</b>      | 5.57E+01                           | 3.22E+01                       | 3.09E+01                        |
| <b>EX_h2o(e)</b>      | 2.60E+04                           | 1.61E+04                       | 1.56E+04                        |
| <b>EX_hdca(e)</b>     | 3.86E+01                           | 2.47E+01                       | 2.39E+01                        |
| <b>EX_hdcea(e)</b>    | 1.42E+00                           | 1.09E+00                       | 1.07E+00                        |
| <b>EX_his_L(e)</b>    | 1.36E+01                           | 7.87E+00                       | 7.56E+00                        |
| <b>EX_hpdca(e)</b>    | 2.08E+00                           | 1.21E+00                       | 1.16E+00                        |
| <b>EX_ile_L(e)</b>    | 2.62E+01                           | 1.51E+01                       | 1.45E+01                        |
| <b>EX_k(e)</b>        | 1.17E+02                           | 7.09E+01                       | 6.84E+01                        |
| <b>EX_leu_L(e)</b>    | 4.72E+01                           | 2.73E+01                       | 2.62E+01                        |
| <b>EX_lgnc(e)</b>     | 1.76E+00                           | 1.01E+00                       | 9.74E-01                        |
| <b>EX_lnlc(e)</b>     | 6.63E+01                           | 4.04E+01                       | 3.89E+01                        |
| <b>EX_lys_L(e)</b>    | 2.72E+01                           | 1.57E+01                       | 1.51E+01                        |
| <b>EX_malt(e)</b>     | 2.76E-01                           | 1.60E-01                       | 1.53E-01                        |

|                  |          |          |          |
|------------------|----------|----------|----------|
| EX_met_L(e)      | 8.31E+00 | 4.80E+00 | 4.61E+00 |
| EX_mg2(e)        | 4.52E+01 | 2.69E+01 | 2.59E+01 |
| EX_mn2(e)        | 6.48E-01 | 3.76E-01 | 3.62E-01 |
| EX_na1(e)        | 1.00E+01 | 5.90E+00 | 5.67E+00 |
| EX_nac(e)        | 5.52E-02 | 3.29E-02 | 3.17E-02 |
| EX_ncam(e)       | 5.52E-02 | 3.29E-02 | 3.17E-02 |
| EX_ocdca(e)      | 7.26E+00 | 4.57E+00 | 4.42E+00 |
| EX_ocdcea(e)     | 1.46E+02 | 9.80E+01 | 9.51E+01 |
| EX_octa(e)       | 4.66E-02 | 2.69E-02 | 2.59E-02 |
| EX_phe_L(e)      | 2.47E+01 | 1.43E+01 | 1.37E+01 |
| EX_phyQ(e)       | 6.31E-05 | 4.37E-05 | 4.25E-05 |
| EX_pi(e)         | 2.76E+01 | 1.62E+01 | 1.55E+01 |
| EX_pnto_R(e)     | 2.88E-02 | 1.67E-02 | 1.60E-02 |
| EX_pro_D(e)      | 1.90E+01 | 1.10E+01 | 1.06E+01 |
| EX_pro_L(e)      | 1.92E+01 | 1.11E+01 | 1.07E+01 |
| EX_pydam(e)      | 3.10E-03 | 2.14E-03 | 2.08E-03 |
| EX_pydx(e)       | 3.14E-03 | 2.16E-03 | 2.11E-03 |
| EX_pydxn(e)      | 3.10E-03 | 2.14E-03 | 2.08E-03 |
| EX_ribflv(e)     | 2.88E-03 | 1.88E-03 | 1.82E-03 |
| EX_ser_L(e)      | 3.95E+01 | 2.28E+01 | 2.19E+01 |
| EX_starch1200(e) | 7.06E-01 | 4.08E-01 | 3.92E-01 |
| EX_strch1(e)     | 7.38E-01 | 4.27E-01 | 4.10E-01 |
| EX_strch2(e)     | 2.64E+00 | 1.52E+00 | 1.46E+00 |
| EX_sucr(e)       | 1.98E+01 | 1.14E+01 | 1.10E+01 |
| EX_thf(e)        | 3.59E-04 | 2.23E-04 | 2.16E-04 |
| EX_thm(e)        | 9.61E-03 | 5.70E-03 | 5.49E-03 |
| EX_thr_L(e)      | 2.61E+01 | 1.51E+01 | 1.45E+01 |
| EX_trp_L(e)      | 4.54E+00 | 2.62E+00 | 2.52E+00 |
| EX_ttdca(e)      | 3.19E-01 | 1.84E-01 | 1.77E-01 |
| EX_tyr_L(e)      | 1.48E+01 | 8.54E+00 | 8.20E+00 |
| EX_val_L(e)      | 3.61E+01 | 2.09E+01 | 2.01E+01 |
| EX_zn2(e)        | 3.37E-01 | 1.96E-01 | 1.88E-01 |
| EX_HC00229(e)    | 2.26E+01 | 2.31E+01 | 6.88E+01 |
| EX_dextrin(e)    | 1.87E+01 | 1.91E+01 | 5.70E+01 |
| EX_kesto(e)      | 3.06E+00 | 3.13E+00 | 9.33E+00 |
| EX_kestopt(e)    | 1.86E+00 | 1.91E+00 | 5.68E+00 |
| EX_kestottr(e)   | 2.32E+00 | 2.37E+00 | 7.06E+00 |

Table S2: Manually added flux for adlay

| metabolites in<br>flux | adlay<br>composition (g<br>metabolites/100g<br>adlay) | D0, D15,<br>D30<br>(mmol/day) | D45, D60<br>(mmol/day) | D75, D105<br>(mmol/day) |
|------------------------|-------------------------------------------------------|-------------------------------|------------------------|-------------------------|
| EX_etoh[e]             |                                                       | 0.00E+00                      | 0.00E+00               | 0.00E+00                |
| EX_h2o[e]              | 8.79E+00                                              | 1.09E+03                      | 6.28E+02               | 6.03E+02                |
| EX_caro[e]             |                                                       | 0.00E+00                      | 0.00E+00               | 0.00E+00                |
| EX_retinol[e]          |                                                       | 0.00E+00                      | 0.00E+00               | 0.00E+00                |
| EX_thm[e]              | 2.00E-05                                              | 1.68E-04                      | 9.69E-05               | 9.31E-05                |
| EX_adpcbl[e]           |                                                       | 0.00E+00                      | 0.00E+00               | 0.00E+00                |
| EX_ribflv[e]           | 5.00E-05                                              | 2.96E-04                      | 1.71E-04               | 1.64E-04                |
| EX_nac[e]              |                                                       | 0.00E+00                      | 0.00E+00               | 0.00E+00                |
| EX_ncam[e]             |                                                       | 0.00E+00                      | 0.00E+00               | 0.00E+00                |
| EX_pnto_R[e]           | 5.00E-04                                              | 5.10E-03                      | 2.95E-03               | 2.83E-03                |
| EX_pydam[e]            |                                                       | 0.00E+00                      | 0.00E+00               | 0.00E+00                |
| EX_pydxn[e]            |                                                       | 0.00E+00                      | 0.00E+00               | 0.00E+00                |
| EX_pydx[e]             |                                                       | 0.00E+00                      | 0.00E+00               | 0.00E+00                |
| EX_btn[e]              |                                                       | 0.00E+00                      | 0.00E+00               | 0.00E+00                |
| EX_10fthf[e]           |                                                       | 0.00E+00                      | 0.00E+00               | 0.00E+00                |
| EX_5mthf[e]            |                                                       | 0.00E+00                      | 0.00E+00               | 0.00E+00                |
| EX_thf[e]              |                                                       | 0.00E+00                      | 0.00E+00               | 0.00E+00                |
| EX_ascb_L[e]           |                                                       | 0.00E+00                      | 0.00E+00               | 0.00E+00                |
| EX_vitd3[e]            |                                                       | 0.00E+00                      | 0.00E+00               | 0.00E+00                |
| EX_avite1[e]           | 1.00E-04                                              | 5.17E-04                      | 2.99E-04               | 2.87E-04                |
| EX_phyQ[e]             |                                                       | 0.00E+00                      | 0.00E+00               | 0.00E+00                |
| EX_ca2[e]              | 1.05E-02                                              | 5.85E-01                      | 3.38E-01               | 3.25E-01                |
| EX_cl[e]               |                                                       | 0.00E+00                      | 0.00E+00               | 0.00E+00                |
| EX_k[e]                | 2.74E-01                                              | 1.56E+01                      | 9.03E+00               | 8.67E+00                |
| EX_mg2[e]              | 1.73E-01                                              | 1.58E+01                      | 9.15E+00               | 8.78E+00                |
| EX_na1[e]              | 9.00E-03                                              | 8.71E-01                      | 5.03E-01               | 4.83E-01                |
| EX_pi[e]               | 3.62E-01                                              | 8.40E+00                      | 4.85E+00               | 4.66E+00                |
| EX_cu2[e]              | 5.39E-04                                              | 1.89E-02                      | 1.09E-02               | 1.05E-02                |
| EX_fe2[e]              | 5.21E-03                                              | 2.08E-01                      | 1.20E-01               | 1.15E-01                |
| EX_fe3[e]              |                                                       | 0.00E+00                      | 0.00E+00               | 0.00E+00                |
| EX_mn2(e)              | 2.79E-03                                              | 1.13E-01                      | 6.53E-02               | 6.27E-02                |
| EX_zn2(e)              | 4.14E-03                                              | 1.41E-01                      | 8.15E-02               | 7.83E-02                |
| EX_mnl(e)              |                                                       | 0.00E+00                      | 0.00E+00               | 0.00E+00                |
| EX_xylt[e]             |                                                       | 0.00E+00                      | 0.00E+00               | 0.00E+00                |
| EX_lcts[e]             |                                                       | 0.00E+00                      | 0.00E+00               | 0.00E+00                |
| EX_malt[e]             |                                                       | 0.00E+00                      | 0.00E+00               | 0.00E+00                |
| EX_sucr[e]             |                                                       | 0.00E+00                      | 0.00E+00               | 0.00E+00                |

|                |          |          |          |          |
|----------------|----------|----------|----------|----------|
| EX_fru[e]      |          | 0.00E+00 | 0.00E+00 | 0.00E+00 |
| EX_gal[e]      |          | 0.00E+00 | 0.00E+00 | 0.00E+00 |
| EX_cellul(e)   | 2.16E+00 | 5.93E-02 | 3.43E-02 | 3.29E-02 |
| EX_ala_L[e]    | 1.54E-02 | 3.83E-01 | 2.22E-01 | 2.13E-01 |
| EX_arg_L[e]    | 6.20E-03 | 7.87E-02 | 4.55E-02 | 4.37E-02 |
| EX_asp_L[e]    | 9.44E-03 | 1.59E-01 | 9.19E-02 | 8.83E-02 |
| EX_cys_L[e]    | 1.43E-03 | 2.63E-02 | 1.52E-02 | 1.46E-02 |
| EX_glu_L[e]    | 3.56E-02 | 5.42E-01 | 3.13E-01 | 3.01E-01 |
| EX_gly[e]      | 3.53E-03 | 1.05E-01 | 6.05E-02 | 5.81E-02 |
| EX_urate[e]    | 0.00E+00 | 0.00E+00 | 0.00E+00 | 0.00E+00 |
| EX_his_L[e]    | 4.85E-03 | 6.96E-02 | 4.02E-02 | 3.86E-02 |
| EX_ile_L[e]    | 5.90E-03 | 1.00E-01 | 5.79E-02 | 5.56E-02 |
| EX_leu_L[e]    | 2.19E-02 | 3.71E-01 | 2.15E-01 | 2.06E-01 |
| EX_lys_L[e]    | 2.54E-03 | 3.84E-02 | 2.22E-02 | 2.13E-02 |
| EX_met_L[e]    | 1.30E-03 | 1.94E-02 | 1.12E-02 | 1.08E-02 |
| EX_phe_L[e]    | 8.16E-03 | 1.10E-01 | 6.35E-02 | 6.10E-02 |
| EX_pro_L[e]    | 1.09E-02 | 2.11E-01 | 1.22E-01 | 1.17E-01 |
| EX_ser_L[e]    | 6.86E-03 | 1.45E-01 | 8.40E-02 | 8.06E-02 |
| EX_thr_L[e]    | 4.48E-03 | 8.37E-02 | 4.84E-02 | 4.65E-02 |
| EX_trp_L[e]    | 0.00E+00 | 0.00E+00 | 0.00E+00 | 0.00E+00 |
| EX_tyr_L[e]    | 6.11E-03 | 7.50E-02 | 4.34E-02 | 4.17E-02 |
| EX_val_L[e]    | 7.90E-03 | 1.50E-01 | 8.67E-02 | 8.33E-02 |
| EX_dca[e]      |          | 0.00E+00 | 0.00E+00 | 0.00E+00 |
| EX_ddca[e]     |          | 0.00E+00 | 0.00E+00 | 0.00E+00 |
| EX_ttdca[e]    | 4.60E-03 | 4.50E-02 | 2.60E-02 | 2.50E-02 |
| EX_ttdcea[e]   |          | 0.00E+00 | 0.00E+00 | 0.00E+00 |
| EX_ptdca[e]    |          | 0.00E+00 | 0.00E+00 | 0.00E+00 |
| EX_hdca[e]     | 1.12E+00 | 9.76E+00 | 5.64E+00 | 5.42E+00 |
| EX_hpdca[e]    | 2.50E-01 | 2.06E+00 | 1.19E+00 | 1.15E+00 |
| EX_ocdca[e]    | 3.60E-01 | 2.83E+00 | 1.63E+00 | 1.57E+00 |
| EX_ocdcea[e]   | 4.91E+00 | 3.88E+01 | 2.24E+01 | 2.16E+01 |
| EX_lnlc[e]     |          | 0.00E+00 | 0.00E+00 | 0.00E+00 |
| EX_lnlnc[e]    |          | 0.00E+00 | 0.00E+00 | 0.00E+00 |
| EX_strdnc[e]   |          | 0.00E+00 | 0.00E+00 | 0.00E+00 |
| EX_arach[e]    |          | 0.00E+00 | 0.00E+00 | 0.00E+00 |
| EX_CE2510[e]   | 8.40E-01 | 6.04E+00 | 3.49E+00 | 3.35E+00 |
| EX_CE4843[e]   |          | 0.00E+00 | 0.00E+00 | 0.00E+00 |
| EX_arachd[e]   |          | 0.00E+00 | 0.00E+00 | 0.00E+00 |
| EX_docosac[e]  |          | 0.00E+00 | 0.00E+00 | 0.00E+00 |
| EX_doco13ac[e] |          | 0.00E+00 | 0.00E+00 | 0.00E+00 |
| EX_adrn[e]     |          | 0.00E+00 | 0.00E+00 | 0.00E+00 |
| EX_clpnd[e]    |          | 0.00E+00 | 0.00E+00 | 0.00E+00 |
| EX_crvnc[e]    |          | 0.00E+00 | 0.00E+00 | 0.00E+00 |
| EX_but[e]      |          | 0.00E+00 | 0.00E+00 | 0.00E+00 |

|                         |          |          |          |          |
|-------------------------|----------|----------|----------|----------|
| <b>EX_octa[e]</b>       |          | 0.00E+00 | 0.00E+00 | 0.00E+00 |
| <b>EX_chsterol[e]</b>   |          | 0.00E+00 | 0.00E+00 | 0.00E+00 |
| <b>EX_sbt_D[e]</b>      |          | 0.00E+00 | 0.00E+00 | 0.00E+00 |
| <b>EX_glc_D[e]</b>      |          | 0.00E+00 | 0.00E+00 | 0.00E+00 |
| <b>EX_hdcea[e]</b>      | 5.00E-02 | 4.39E-01 | 2.54E-01 | 2.44E-01 |
| <b>EX_lgnc[e]</b>       | 2.90E-01 | 1.76E+00 | 1.01E+00 | 9.74E-01 |
| <b>EX_fol[e]</b>        | 1.60E-05 | 8.08E-05 | 4.67E-05 | 4.49E-05 |
| <b>EX_strch1[e]</b>     |          | 0.00E+00 | 0.00E+00 | 0.00E+00 |
| <b>EX_i[e]</b>          |          | 0.00E+00 | 0.00E+00 | 0.00E+00 |
| <b>EX_starch1200(e)</b> | 6.12E+01 | 6.99E-01 | 4.04E-01 | 3.88E-01 |

Table S3: Manually added flux for other nutritions

| other<br>metabolites | D0, D15, D30<br>(mmol/day) | D45, D60<br>(mmol/day) | D75, D105<br>(mmol/day) |
|----------------------|----------------------------|------------------------|-------------------------|
| isomaltose           | 22.56                      | 23.08                  | 68.77                   |
| dxtrin               | 18.70                      | 19.13                  | 57.01                   |
| kestose              | 3.06                       | 3.13                   | 9.33                    |
| kestopentaose        | 1.86                       | 1.91                   | 5.68                    |
| kestotetraose        | 2.32                       | 2.37                   | 7.06                    |
